# Supplementary material
Source: PubMed Central journal article supplement (PMC8033604)
Supplement: pt0c00169_si_001.pdf [file pt0c00169_si_001.pdf]

## TITLE

**Psilocybin-assisted group therapy and attachment: Observed reduction in attachment anxiety and influences of attachment insecurity on the psilocybin experience**

## AUTHORS

Christopher S Stauffer<sup>1,2,3,\*</sup>

Brian T Anderson<sup>2,4</sup>

Kile M Ortigo<sup>5</sup>

Joshua Woolley<sup>1,2</sup>

<sup>1</sup>University of California, San Francisco Department of Psychiatry and Behavioral Sciences

<sup>2</sup>San Francisco Veterans Affairs Medical Center Mental Health

<sup>3</sup>Oregon Health & Science University Department of Psychiatry & VA Portland Health Care System

<sup>4</sup>Zuckerberg San Francisco General Hospital

<sup>5</sup>Center for Existential Exploration

### **\*Corresponding Author:**

Christopher S Stauffer

1601 E 4<sup>th</sup> Plain Blvd (V3SATP)

Vancouver, WA 98661, USA

(360) 696-4061 x32017

Fax: (940) 514-9081

[Christopher.Stauffer@va.gov](mailto:Christopher.Stauffer@va.gov)

## Supporting Information Table of Contents

|                        |     |
|------------------------|-----|
| Cover Page.....        | S-1 |
| Table of Contents..... | S-2 |
| Figure S-1.....        | S-3 |

**FIGURE S-1**

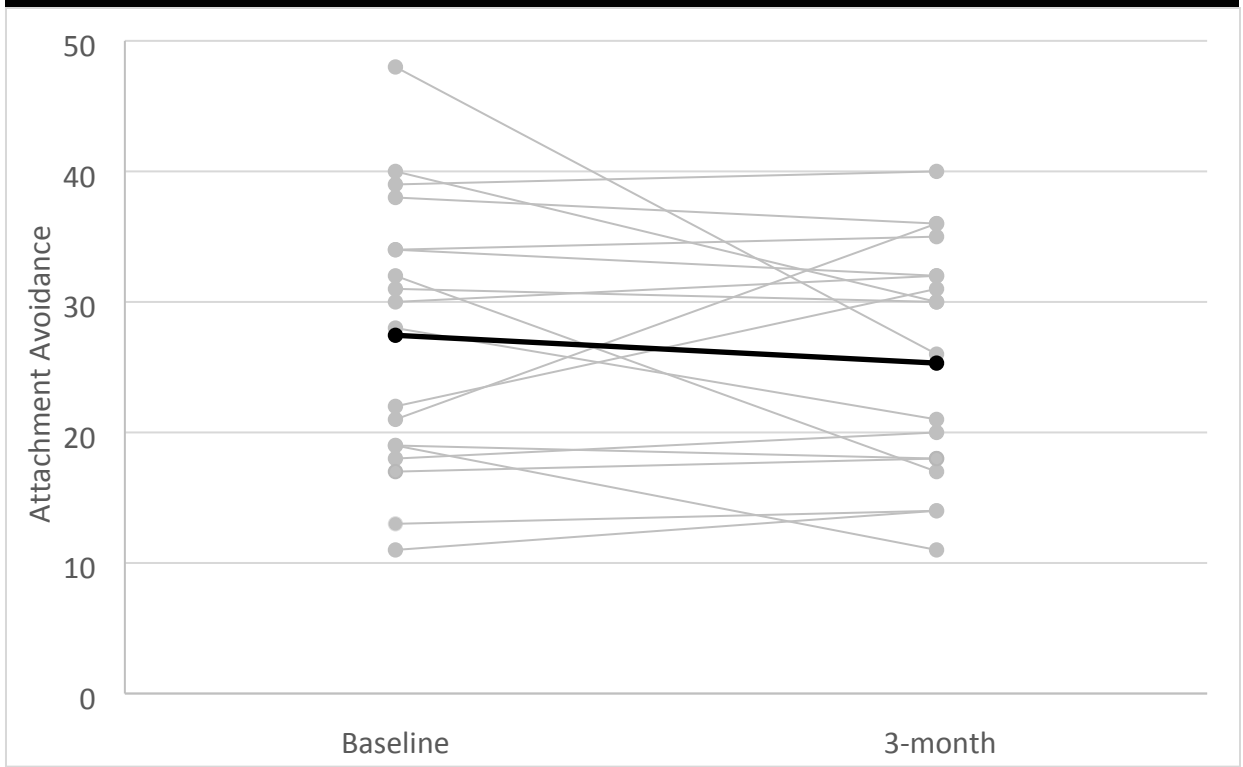

**Figure S-1:** Experiences in Close Relationships (ECR-M16) subscale for attachment avoidance at baseline and 3-month follow-up. Bold line is average.
